# Supplementary material
Source: PubMed Central journal article supplement (PMC4633817)
Supplement: ncomms9548-s1.pdf [file ncomms9548-s1.pdf]

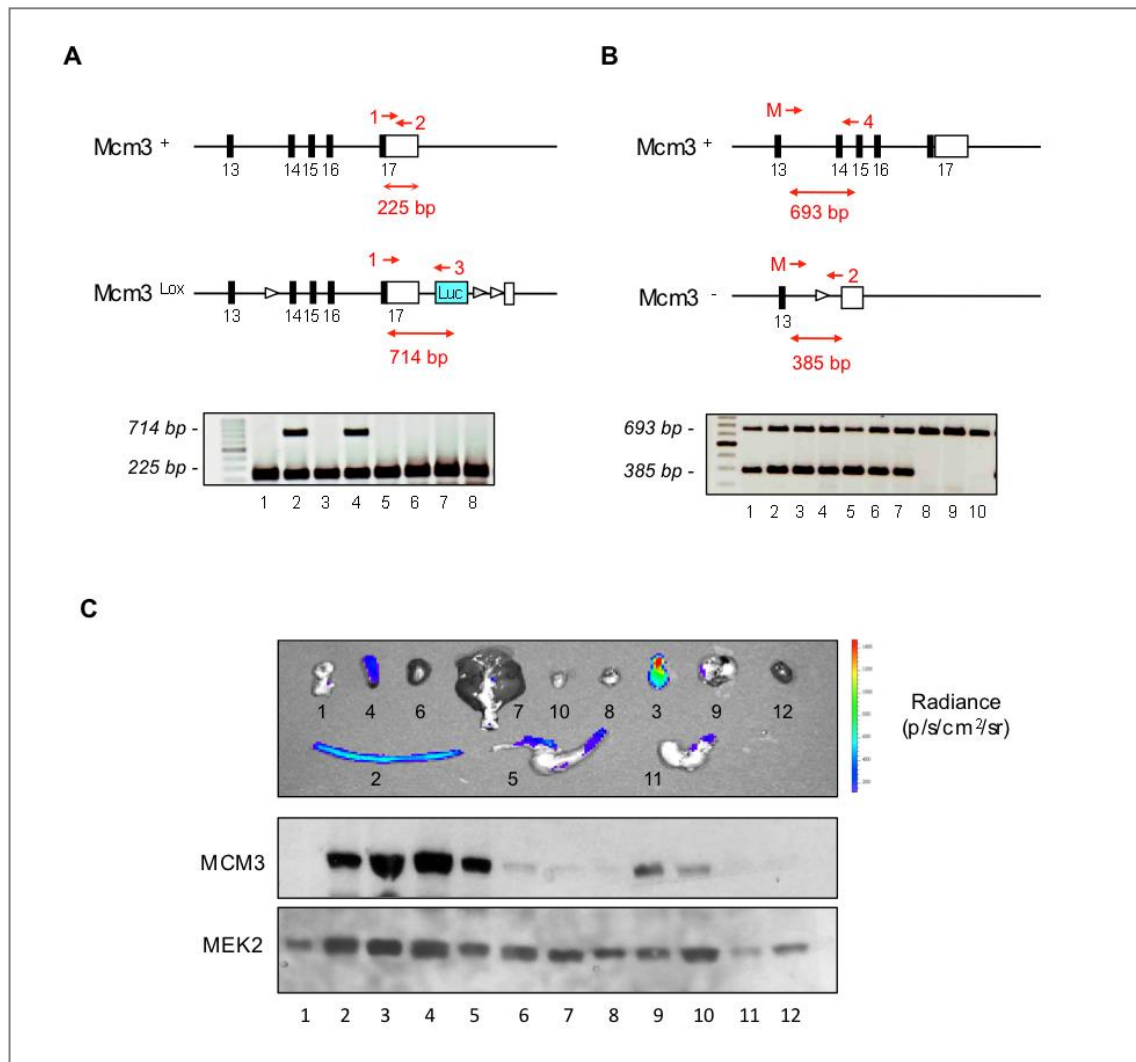

**Supplementary Figure 1. Genotyping strategies for *Mcm3*<sup>+/+</sup>, *Mcm3*<sup>+/*Lox*</sup> and *Mcm3*<sup>+/-</sup> mice and luciferase activity in *Mcm3*<sup>+/*Lox*</sup> mice.** **A.** Upper part, three-primer PCR strategy at the *Mcm3* locus yielding a 225 bp product in the wild-type allele and a 714 bp product in the *Mcm3-Lox* allele. Arrows indicate primer positions. Bottom part, genotyping examples of eight mice, of which #2 and #4 are *Mcm3*<sup>+/*Lox*</sup>. **B.** Upper part, three-primer strategy yielding a 693 bp product in the wild-type *Mcm3* allele and a 385 bp product in the *Mcm3*-null allele. Bottom part, genotyping examples of 10 mice, of which #1 to #7 were *Mcm3*<sup>+/-</sup>. **C.** Top, bioluminescent signal in internal organs of *Mcm3*<sup>+/*Lox*</sup> mice. Bottom, MCM3 protein level determined by immunoblot in extracts prepared from the same tissues. MEK2 levels are shown as reference. Full immunoblots are shown in Supplementary Fig. 9B. Tissue code: 1, pancreas; 2, small intestine; 3, testis; 4, spleen; 5, large intestine; 6, kidney; 7, liver; 8, seminal vesicle; 9, lung; 10, bladder; 11, stomach; 12, heart.

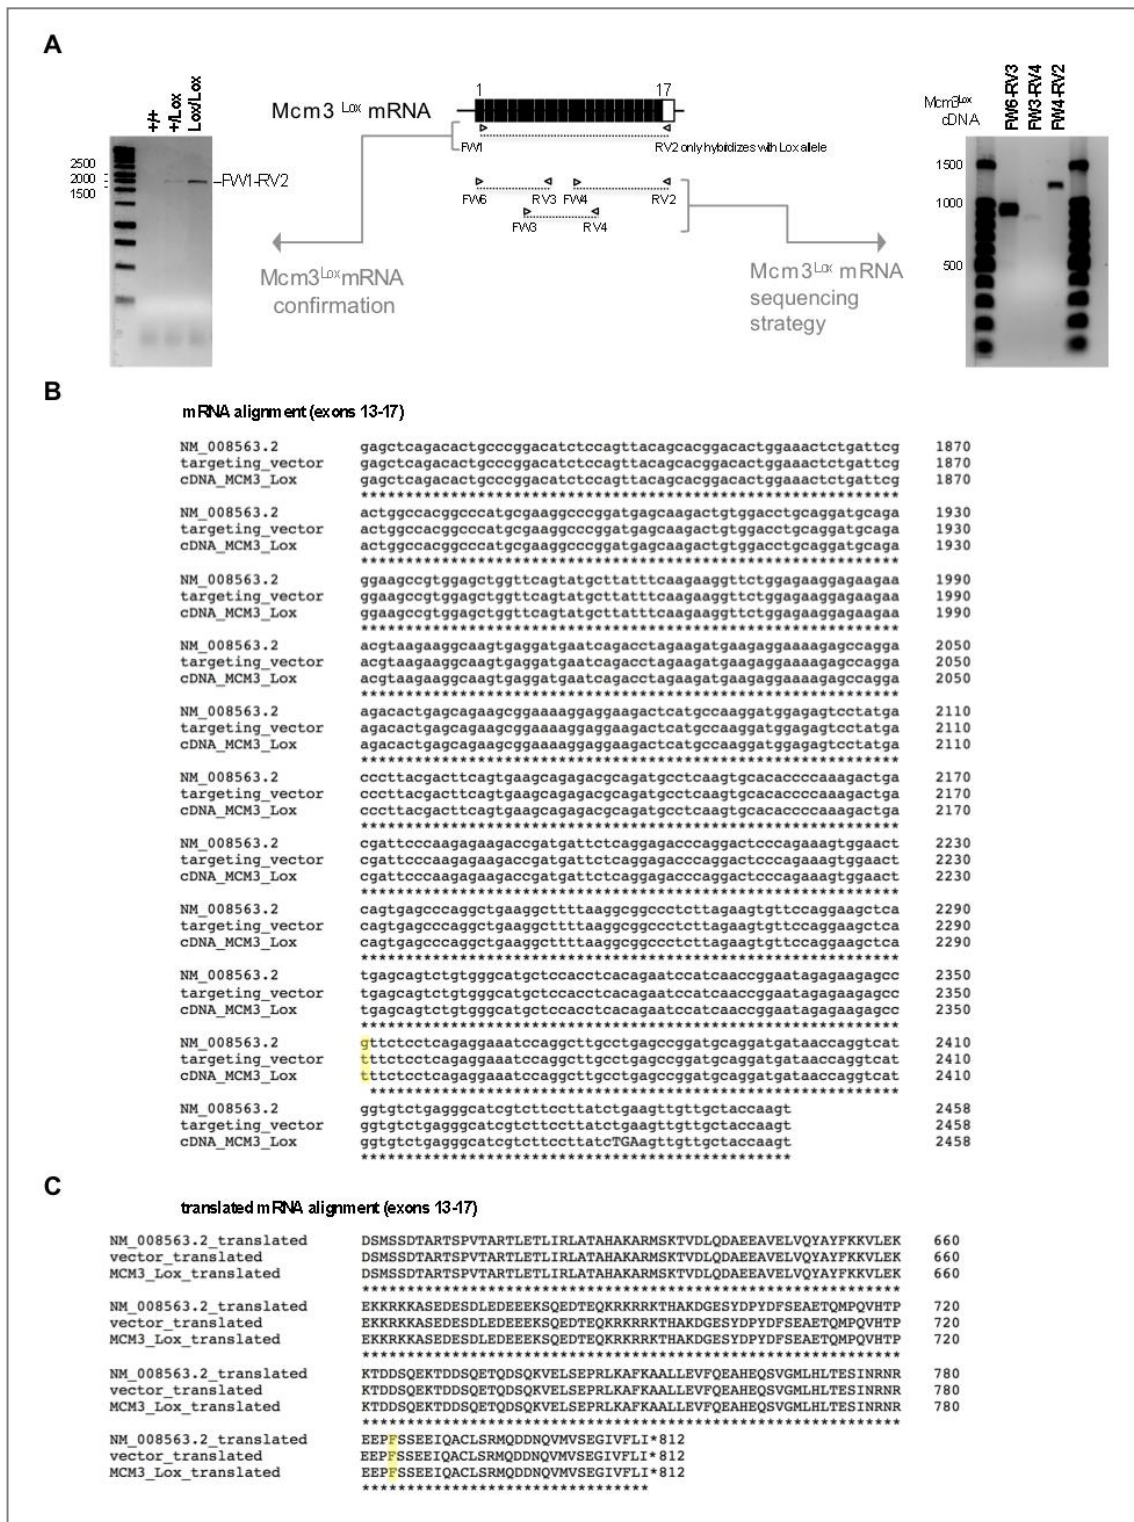

**Supplementary Figure 2. Complete mRNA sequencing of the Mcm3-Lox allele. A.** Schematic representation of the Mcm3-Lox mRNA. Left, PCR reactions confirming the presence of Mcm3-Lox mRNA only in MEFs of Mcm3<sup>+Lox</sup> and Mcm3<sup>Lox/Lox</sup> genotype. Right, PCR reactions showing amplification of three overlapping cDNA fragments used for sequencing. **B.** Alignment of the experimental mRNA-derived Mcm3-Lox sequence with the murine Mcm3 NCBI reference sequence (NM\_008563.2) and the targeting vector used for mouse generation. Only the last four exons are shown for clarity. Numbers are positions from ATG (+1). The experimental sequence was identical

(100%) to that of the targeting vector. One silent point mutation (G-T) at position 2351 (highlighted in yellow) was found in both the experimental and vector sequences, relative to the reference sequence. The corresponding amino acid in MCM3 protein (Phe784) remained invariant. **C.** Alignment of the corresponding protein sequences. Numbers indicate positions from the +1 Met amino acid.

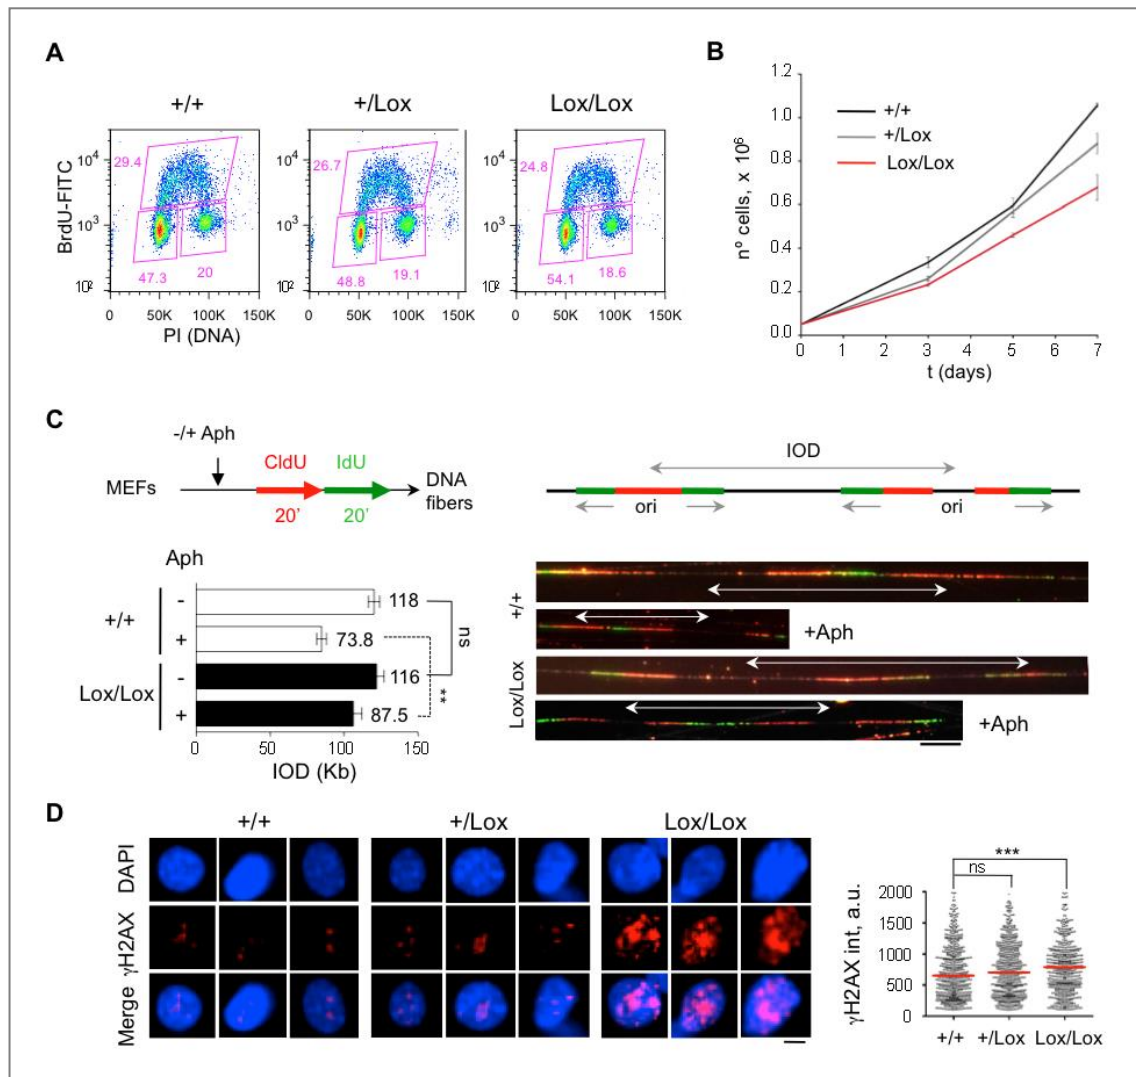

**Supplementary Figure 3. DNA replication with reduced activation of dormant origins in  $Mcm3^{Lox/Lox}$  MEFs.** **A.** BrdU incorporation profiles in  $Mcm3^{+/+}$ ,  $Mcm3^{+/Lox}$  and  $Mcm3^{Lox/Lox}$  MEFs. The percentage of cells in the G1, S and G2/M phases of the cell cycle are indicated. **B.** Proliferation curves of  $Mcm3^{+/+}$ ,  $Mcm3^{+/Lox}$  and  $Mcm3^{Lox/Lox}$  MEFs. Error bars represent SD of duplicates. **C.** Top left, outline of the experiment. MEFs were sequentially labeled with CldU (red) and IdU (green), in the absence or presence of 0.5  $\mu$ M aphidicolin. Top right, schematic of a DNA molecule with two active origins, representing the fibers used to measure inter-origin distance (IOD). Bottom left, quantification of IOD of  $Mcm3^{+/+}$ ,  $Mcm3^{+/Lox}$  and  $Mcm3^{Lox/Lox}$  MEFs. Median IOD values are indicated (70-100 IODs scored for each condition). Experiments were done in triplicate and statistical analysis was done with Fisher's test (\*\*  $p < 0.01$ ; n.s. not significant). Bottom right, fiber examples. Scale bar, 10  $\mu$ m. **D.** Confocal microscopy images of  $\gamma$ H2AX nuclear staining in  $Mcm3^{+/+}$ ,  $Mcm3^{+/Lox}$  and  $Mcm3^{Lox/Lox}$  MEFs. Scale bar, 2.5  $\mu$ m. Right, quantification of  $\gamma$ H2AX nuclear intensity. Red lines indicate the median value (>700 nuclei scored per condition). Data are representative of 3 independent experiments. P-values were calculated by Mann-Whitney test (\*\*\*  $p < 0.001$ ; ns, not significant).

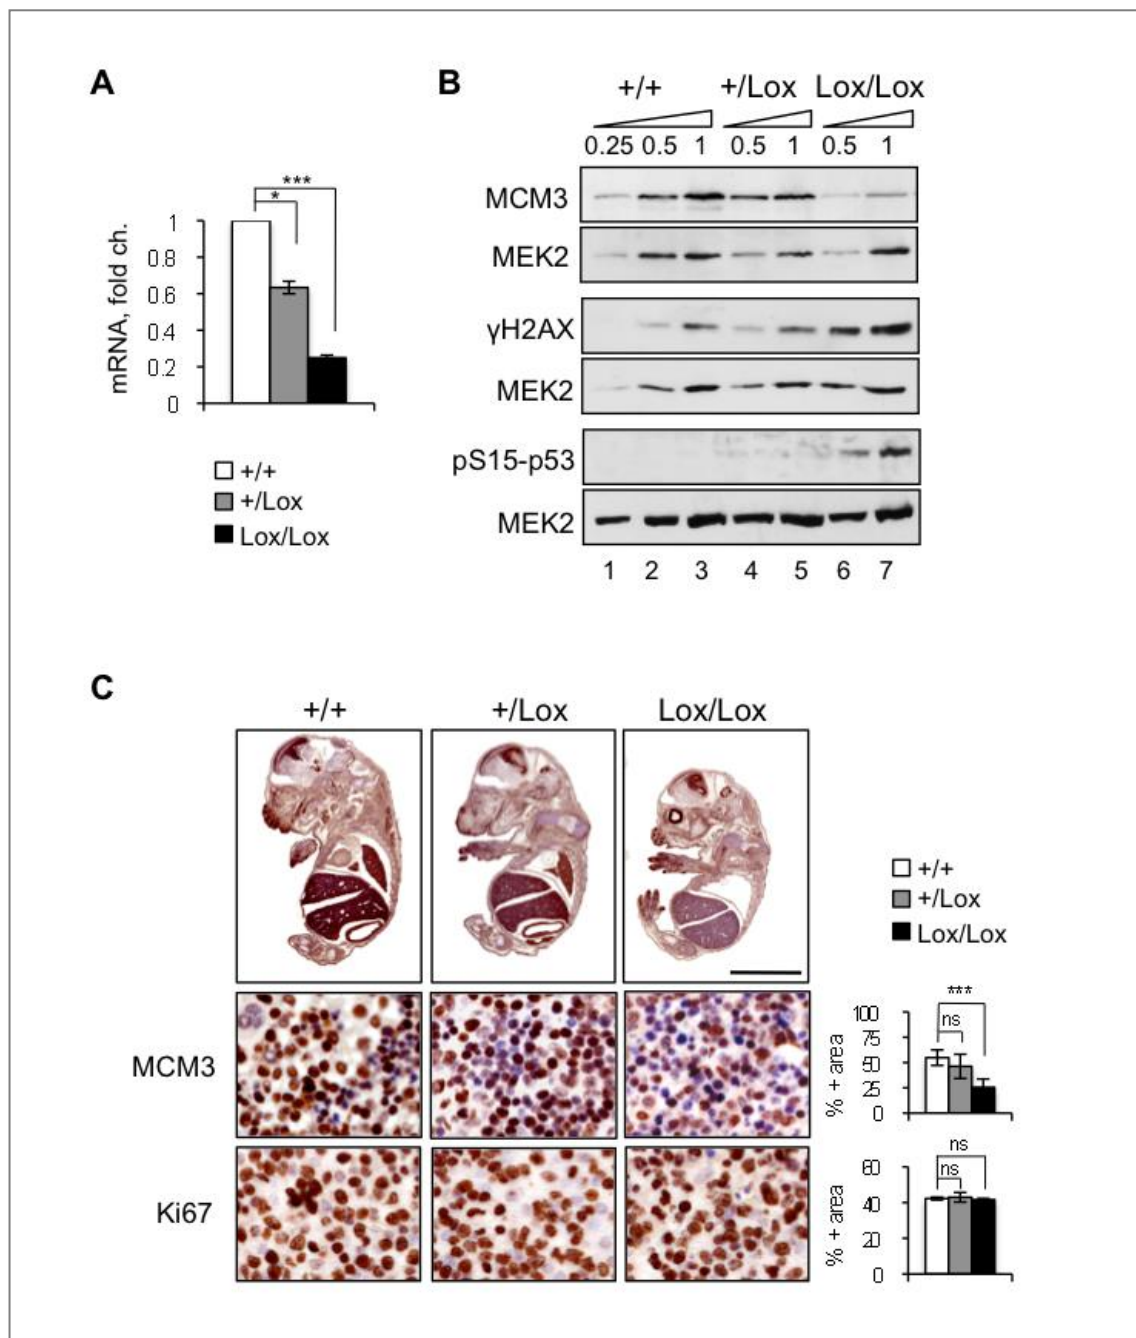

**Supplementary Figure 4. Low expression of Mcm3 in the fetal liver of Mcm3<sup>Lox/Lox</sup> embryos.** **A.** Mcm3 mRNA expression in the fetal liver of Mcm3<sup>+/+</sup>, Mcm3<sup>+/Lox</sup> and Mcm3<sup>Lox/Lox</sup> embryos, as determined by qRT-PCR. Histogram bars represent average value  $\pm$  SD of 3 independent experiments. **B.** Immunoblots showing total MCM3,  $\gamma$ H2AX and pS15-p53 protein levels in fetal liver extracts. For accurate comparisons, different amounts of each extract were loaded. In each SDS-PAGE, MEK2 levels are shown as loading control. Full immunoblots are shown in Supplementary Fig. 9C. **C.** Top, IHC detection of MCM3 protein in Mcm3<sup>+/+</sup>, Mcm3<sup>+/Lox</sup> and Mcm3<sup>Lox/Lox</sup> whole-embryo (E16.5) sections. Scale bar, 5 mm. Lower panels, IHC of MCM3 and Ki67 and  $\gamma$ H2AX in the fetal liver. Scale bar, 25  $\mu$ M. Signal quantifications represents staining-positive area (average value  $\pm$  SD) in the fetal liver of Mcm3<sup>+/+</sup> (n=4 for MCM3, n=2 for Ki67); Mcm3<sup>+/Lox</sup> (n=5 for MCM3, n=2 for Ki67) and Mcm3<sup>Lox/Lox</sup> (n=5 for MCM3, n=2 for Ki67) embryos. P-values were calculated by Fisher's test (\*\*p<0.01; \*\*\*p<0.001; n.s. not significant).

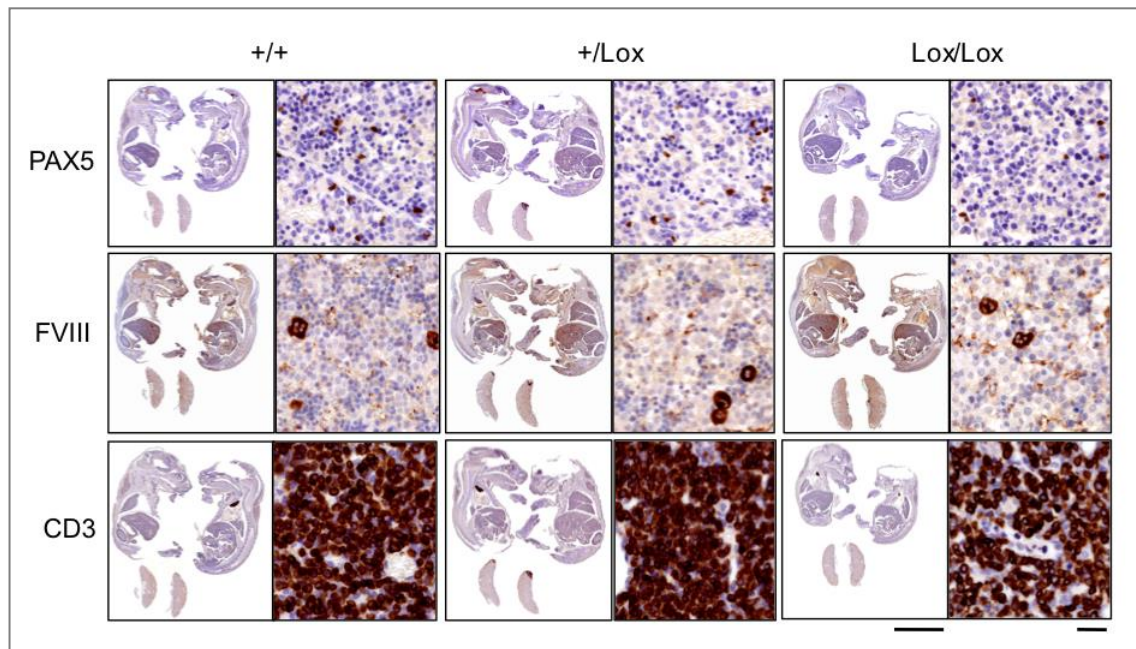

**Supplementary Figure 5. IHC stainings of mature hematopoietic populations in fetal liver and thymus.** IHC stainings of B-lymphocytes (Pax5), megakaryocytes (FVIII) and T-lymphocytes (CD3) in  $MCM3^{+/+}$ ,  $MCM3^{+/Lox}$  and  $MCM3^{Lox/Lox}$  whole embryos. Scale bar, 5 mm. Magnifications show Pax5 and FVIII staining in the fetal liver and CD3 staining in the fetal thymus. Scale bar, 50  $\mu$ m.

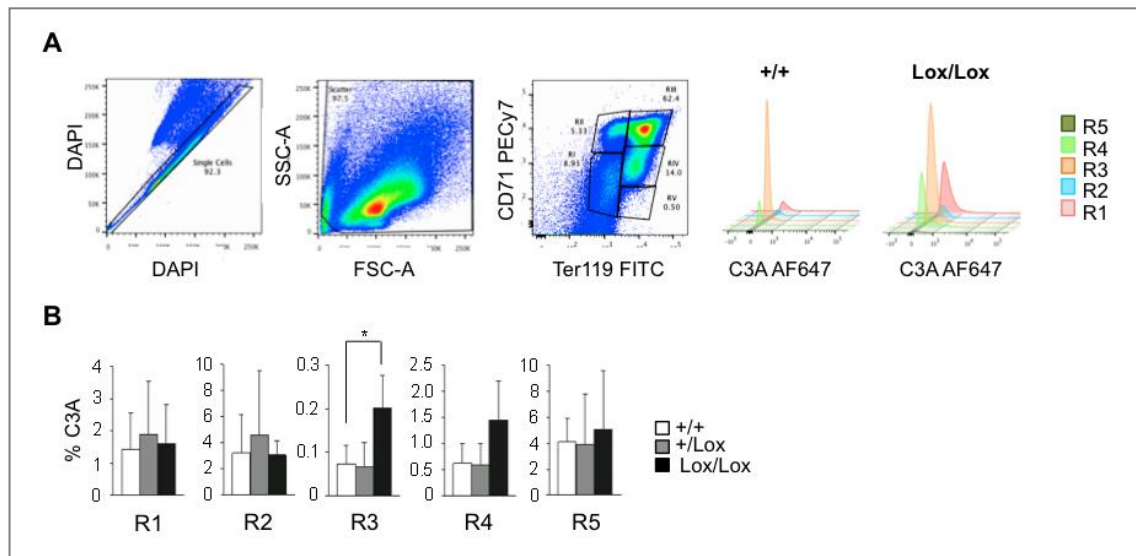

**Supplementary Figure 6. Detection of activated caspase 3 in  $Mcm3^{Lox/Lox}$  EBs. A.** Examples of cytometric detection of activated caspase 3 (C3A) in R1-R5 EBs previously gated using CD71/Ter119. See Materials and Methods for details. **B.** Quantification of the percentage of C3A-positive cells in each population (n=5  $Mcm3^{+/+}$ , n=6  $Mcm3^{+/Lox}$ , n=6  $Mcm3^{Lox/Lox}$ ). \* denotes p < 0.05 in One-way Anova test).

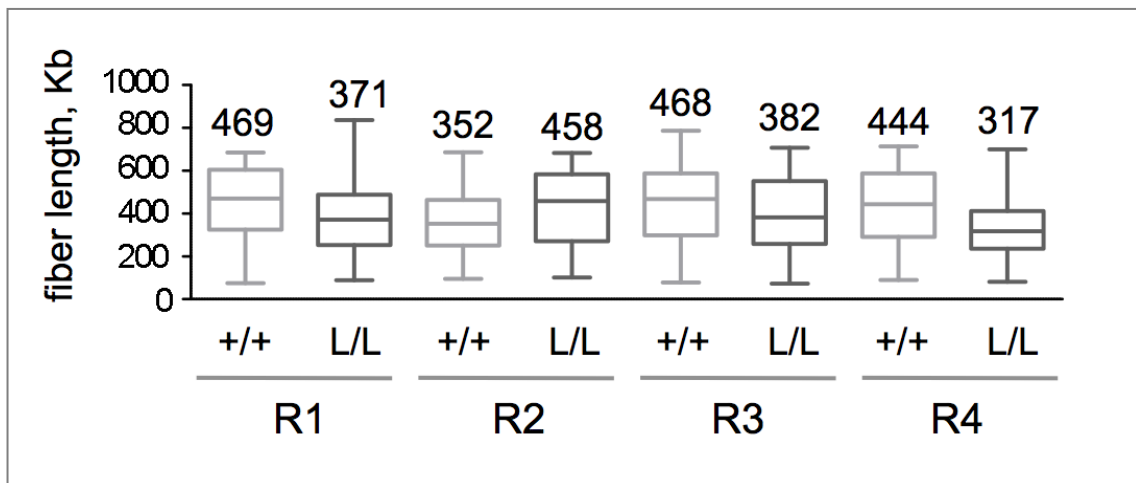

**Supplementary Figure 7. Quantification of DNA fiber length in the experiments shown in Main Figure 5.** Box-plot representation of DNA fiber lengths. A minimum of 200 fibers labeled with at least one replication structure (origin/fork/termination) were counted in each condition. The median value of fiber length is indicated in each case.



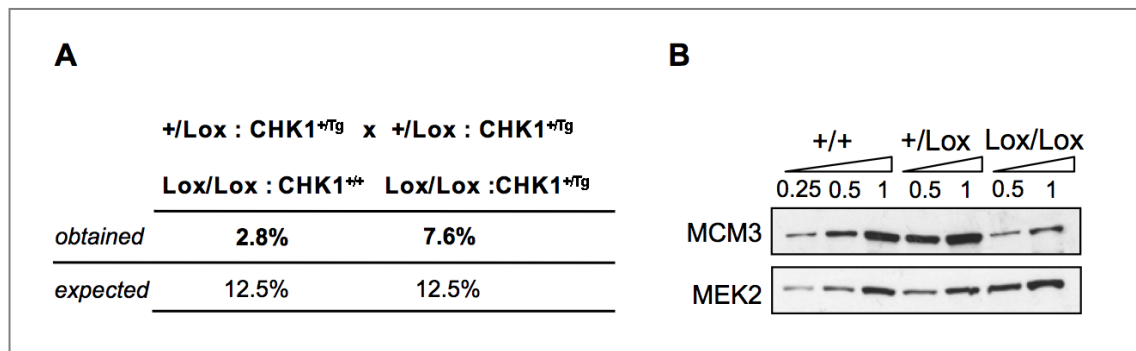

**Supplementary Figure 8. Partial rescue of  $\text{Mcm3}^{\text{Lox}/\text{Lox}}$  embryonic lethality by  $\text{Chk1}$  overexpression. **A.** Percentages of mice of the indicated genotypes (obtained/expected) derived from continued breeding of  $\text{Mcm3}^{+/Lox} : \text{Chk1}^{+/Tg}$  mice. **B.** Immunoblots showing MCM3 protein levels in whole fetal liver extracts of  $\text{Mcm3}^{+/+}$ ,  $\text{Mcm3}^{+/Lox}$ ,  $\text{Mcm3}^{\text{Lox}/\text{Lox}}$  embryos in the  $\text{Chk1}^{+/Tg}$  genetic background. The amount of MCM3 protein in  $\text{Mcm3}^{\text{Lox}/\text{Lox}}$  extracts is comparable to that of the C57BL/6 background, shown in Supplementary Fig. 4. Full immunoblots are shown in Supplementary Fig. 9D.**

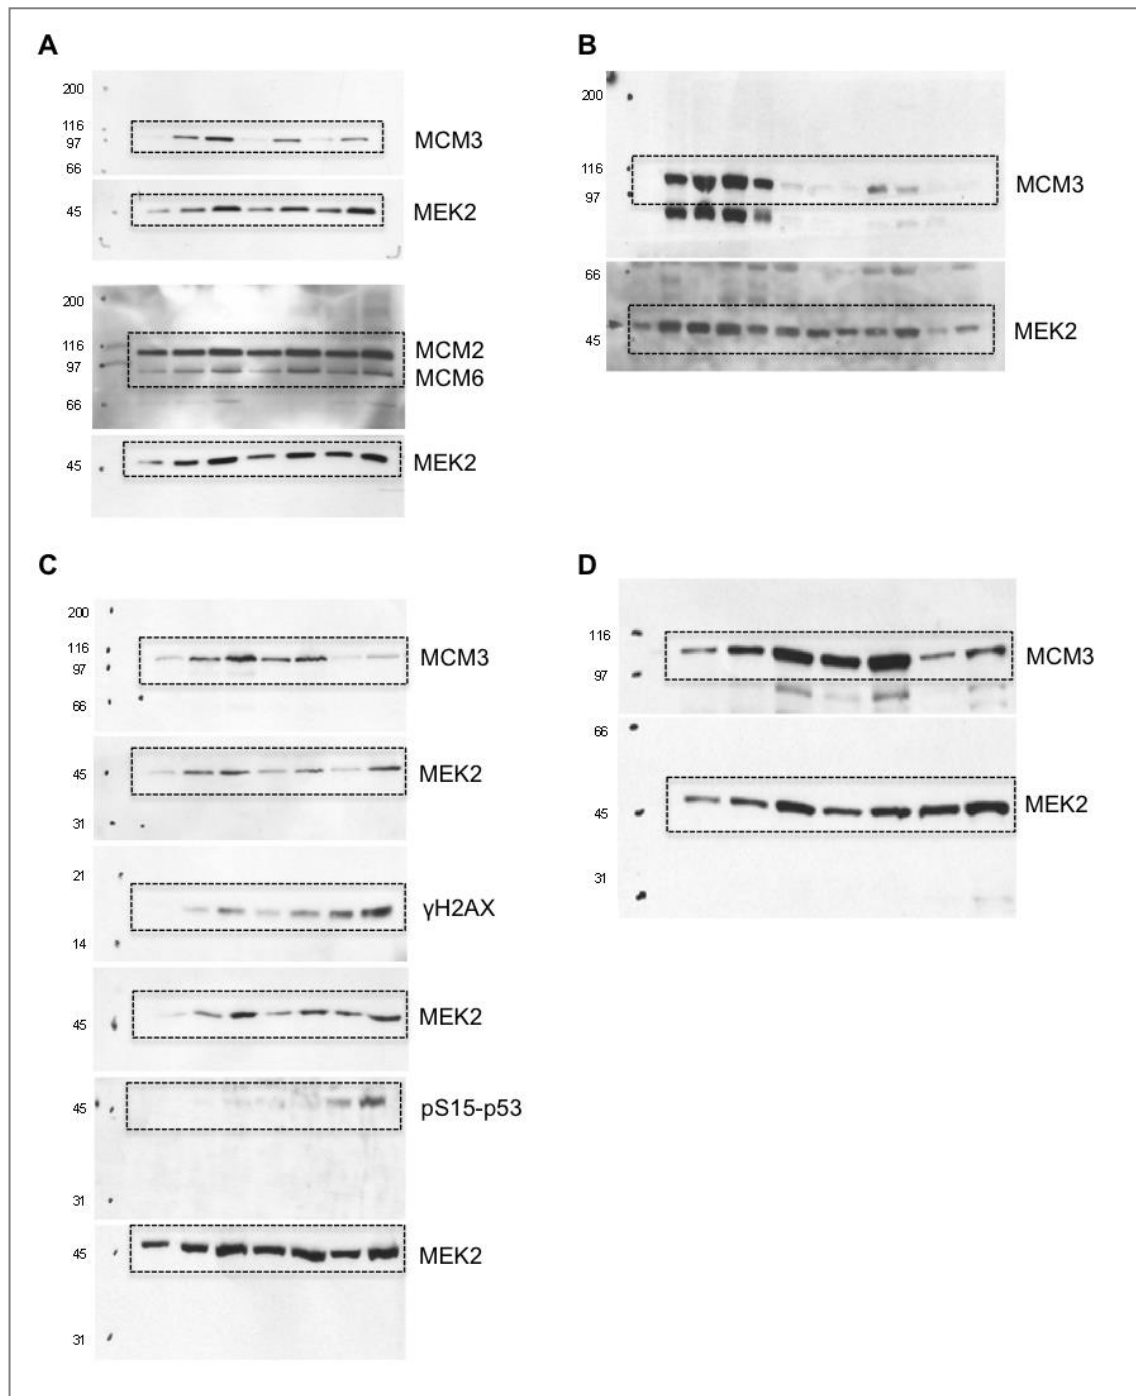

**Supplementary Figure 9. Full immunoblots.** This figure includes larger areas of the immunoblots corresponding to (A) Figure 1F; (B) Supplementary Figure 1C; (C) Supplementary Figure 4B; (D) Supplementary Figure 8B. Dashed boxes correspond to the area shown in the main figures.

| Case   | Age (months) | Diagnosis                            | Location             | IHC |
|--------|--------------|--------------------------------------|----------------------|-----|
| BBG107 | 20           | Lymphoma                             | Spleen               | H&E |
| BBG115 | 30,5         | Lymphoma                             | Liver                | H&E |
|        |              |                                      | Lymphatic gland      | H&E |
|        |              |                                      | Spleen               | H&E |
|        |              | Kidney                               | H&E                  |     |
|        |              | Adenomatous hyperplasia              | Thyroid              | H&E |
| BBG132 | 29           | Follicular lymphoma                  | Spleen               | H&E |
|        |              | Infiltration                         | Lung                 | H&E |
|        |              | Follicular adenoma                   | Thyroid              | H&E |
|        |              | Epithelial hyperplasia               | Skin                 | H&E |
|        |              | Polyp                                | Intestine            | H&E |
| BBG185 | 28           | Histiocytic sarcoma                  | Spleen               | H&E |
| BBG193 | 27,5         | Lymphoma                             | Spleen               | H&E |
|        |              | Lymphoma infiltration                | Adipose tissue       | H&E |
| BBG602 | 18           | Adenocarcinoma                       | Harderian gland      | H&E |
| BBG621 | 18,5         | Bronchioalveolar adenocarcinoma (II) | Lung                 | H&E |
|        |              | Hyperplasia                          | Forestomach          | H&E |
| BBG656 | 19           | Lymphoma                             | Spleen               | H&E |
|        |              |                                      | Peripancreatic gland | H&E |

**Supplementary Table 1.** Summary of tumor incidence in MCM3<sup>+/+</sup> mice.

| <b>Case</b> | <b>Age (months)</b> | <b>Diagnosis</b>    | <b>Location</b>     | <b>IHC</b>          |
|-------------|---------------------|---------------------|---------------------|---------------------|
| BBG51*      | 30                  | Adenocarcinoma      | Lung                | H&E                 |
|             |                     | Hepatocarcinoma     | Liver               | H&E                 |
| BBG52*      | 30                  | Histiocytic sarcoma | Skin                | H&E                 |
|             |                     |                     | Stomach             | H&E                 |
|             |                     |                     | Lung                | H&E                 |
|             |                     |                     | Lymphatic gland     | H&E                 |
| BBG54*      | 33                  | Histiocytic sarcoma | Liver               | H&E                 |
| BBG55*      | 33                  | Histiocytic sarcoma | Liver               | F4/80               |
| BBG60*      | 28                  | Lymphoma            | Mesenteric ganglion | H&E                 |
|             |                     |                     | Kidney              | H&E                 |
|             |                     |                     | Spleen              | PAX5/ CD3/<br>F4/80 |
| BBG66*      | 22                  | Lymphoma            | Spleen              | H&E                 |
| BBG137*     | 23                  | Histiocytic sarcoma | Liver               | CD3/ F4/80          |
| BBG145*     | 26                  | Lymphoma            | Mesenteric ganglion | H&E                 |
|             |                     |                     | Spleen              | H&E                 |
|             |                     |                     | Adipose tissue      | H&E                 |
| BBG150*     | 22                  | Adenocarcinoma      | Mammary gland       | H&E                 |
| BBG170*     | 28                  | Angiosarcoma        | Spleen              | H&E                 |
| BBG177*     | 23                  | Lymphoma            | Lymphatic glands    | H&E                 |
|             |                     |                     | Mesenteric ganglion | H&E                 |
|             |                     |                     | Ureter              | H&E                 |
|             |                     |                     | Thymus              | H&E                 |
|             |                     |                     | Lung                | H&E                 |
|             |                     |                     | Bone marrow         | H&E                 |
| BBG181*     | 25                  | Lymphoma            | Spleen              | PAX5/ CD3           |
|             |                     |                     | Liver               | H&E                 |
|             |                     |                     | Mesenteric ganglion | H&E                 |
|             |                     |                     | Kidney              | H&E                 |
| BBG190*     | 25                  | Lymphoma            | Spleen              | H&E                 |
|             |                     | Adenocarcinoma      | Lung                | H&E                 |
| BBG202*     | 21                  | Papilloma           | Stomach             | H&E                 |
| BBG203*     | 21                  | Lymphoma            | Spleen              | H&E                 |

|                    |             |                         |                     |              |
|--------------------|-------------|-------------------------|---------------------|--------------|
|                    |             |                         | Mesenteric ganglion | H&E          |
|                    |             |                         | Pancreas            | H&E          |
|                    |             |                         | Lung                | H&E          |
| BBG235*            | 28          | Lymphoma                | Spleen              | H&E          |
|                    |             |                         | Adipose tissue      | H&E          |
|                    |             |                         | Mammary gland       | H&E          |
|                    |             | Hepatocarcinoma         | Liver               | H&E          |
|                    |             | Adenoma                 | Small intestine     | H&E          |
|                    |             |                         | Thyroid             | H&E          |
| BBG261*            | 20          | Lymphoma                | Spleen              | PAX5         |
| BBG295*            | 20          | Lymphoma                | Mesenteric ganglion | PAX5/ CD3    |
|                    |             |                         | Spleen              | H&E          |
|                    |             |                         | Kidney              | H&E          |
|                    |             |                         | Lung                | H&E          |
|                    |             |                         | Mammary gland       | H&E          |
|                    |             | Lipoma                  | Adipose tissue      | H&E          |
| BBG335             | 23          | Follicular hyperplasia  | Thyroid             | H&E          |
| BBG340*            | 20          | Angiosarcoma            | Bone                | CD31         |
|                    |             |                         | Adipose tissue      | H&E          |
|                    |             |                         | Spleen              | H&E          |
| BBG427             | 21.5        | Lymphoma                | Spleen              | H&E          |
|                    |             |                         | Adipose tissue      | H&E          |
|                    |             |                         | Lymphatic glands    | H&E          |
|                    |             |                         | Pancreas            | H&E          |
|                    |             | Papilloma               | Intestine           | H&E          |
|                    |             |                         | Stomach             | H&E          |
|                    |             | Adenomatous hyperplasia | Thyroid             | H&E          |
| Cystic hyperplasia | Endometrium | H&E                     |                     |              |
| BBG518             | 23          | Lymphoma                | Spleen              | H&E          |
|                    |             |                         | Bone marrow         | H&E          |
|                    |             |                         | Prostate            | H&E          |
|                    |             |                         | Epididyme           | H&E          |
| BBG632             | 21          | Lymphoma                | Spleen              | H&E          |
|                    |             |                         | Bone marrow         | H&E          |
|                    |             | Follicular hyperplasia  | Thyroid             | H&E          |
| BBG664             | 12          | Leiomyosarcoma          | Adipose tissue      | Actin /p-p53 |
|                    |             |                         | Skin                |              |

|        |    |                     |                |            |
|--------|----|---------------------|----------------|------------|
|        |    | Histiocytic sarcoma | Muscle         | F4/80 /CD3 |
| BBG802 | 12 | Adenoma             | Thyroid        | H&E        |
|        |    | Lipoma              | Adipose tissue | H&E        |

**Supplementary Table 2.** Summary of tumor incidence in MCM3<sup>+/-Lox</sup> and MCM3<sup>+/-Lox-Neo</sup> (\*) mice.

| Case                 | Age (months) | Diagnosis                         | Location                                  | IHC              |
|----------------------|--------------|-----------------------------------|-------------------------------------------|------------------|
| BBG111               | 30,5         | Lymphoma                          | Lymphatic glands                          | H&E              |
|                      |              |                                   | Liver                                     | H&E              |
|                      |              |                                   | Spleen                                    | H&E              |
|                      |              | Adrenal hyperplasia               | Kidney                                    | H&E              |
|                      |              | Papilloma                         | Stomach                                   | H&E              |
|                      |              | Serous cystadenome                | Uterus                                    | H&E              |
|                      |              | Adenomatous hyperplasia           | Small intestine                           | H&E              |
| BBG264               | 21           | Lymphoma                          | Peripancreatic gland                      | CD3/ PAX5/ F4/80 |
|                      |              |                                   | Kidney                                    | H&E              |
|                      |              |                                   | Liver                                     | H&E              |
|                      |              |                                   | Lung                                      | H&E              |
|                      |              | Follicular hyperplasia            | Thyroid gland                             | H&E              |
| Prostate hyperplasia | Prostate     | H&E                               |                                           |                  |
| BBG269               | 23           | Adenocarcinoma                    | Lung                                      | H&E              |
| BBG271               | 23           | Lymphoma                          | Pancreas                                  | CD3/ PAX5        |
|                      |              | Follicular adenoma                | Spleen, mesenteric and thoracic ganglions | CD3/ PAX5        |
|                      |              | Ductal hyperplasia                | Mammary gland                             | H&E              |
| BBG275               | 21           | Adenocarcinoma                    | Lung                                      | H&E              |
|                      |              | Hyperplasia                       | Thyroid                                   | H&E              |
| BBG277               | 23           | Mesothelioma                      | Mesenteric ganglion                       | H&E              |
|                      |              | Hyperplasia                       | Thymus                                    | H&E              |
| BBG464               | 17,5         | Lymphoma                          | Peripancreatic gland                      | H&E              |
| BBG624               | 17           | Hepatocarcinoma                   | Liver                                     | H&E              |
|                      |              | Adenoma                           | Small intestine                           | H&E              |
| BBG640               | 13           | Histiocytic sarcoma (B-cell type) | Liver                                     | H&E              |
|                      |              |                                   | Adipose tissue                            | H&E              |
|                      |              |                                   | Spleen                                    | H&E              |
|                      |              |                                   | Lung                                      | H&E              |
|                      |              |                                   | Lymphatic ganglions                       | H&E              |
|                      |              |                                   | Testis                                    | H&E              |
|                      |              |                                   | Bladder                                   | H&E              |
| BBG642               | 18           | Lymphoma                          | Intestine                                 | H&E              |

|        |      |                               |                      |                      |
|--------|------|-------------------------------|----------------------|----------------------|
|        |      |                               | Liver                | H&E                  |
|        |      | Adrenal hyperplasia           | Kidney               | H&E                  |
|        |      | Hyperplasia                   | Bladder              | H&E                  |
|        |      | Myeloid hyperplasia           | Bone Marrow          | H&E                  |
| BBG644 | 12   | Adenoma                       | Thyroid/ Parathyroid | H&E                  |
|        |      | Hyperplasia<br>(Leydig cells) | Testis               | H&E                  |
| BBG651 | 12   | Lymphoma                      | Spleen               | Pax5                 |
|        |      |                               | Lymphatic glands     | H&E                  |
|        |      |                               | Adipose tissue       | H&E                  |
|        |      | Cholangioma                   | Liver                | Cytokeratin 19/ CD31 |
| BBG689 | 17,5 | Lymphoma                      | Kidney               | H&E                  |
|        |      | Follicular hyperplasia        | Thyroid              | H&E                  |
| BBG943 | 15,5 | Hyperplasia                   | Stomach              | H&E                  |

**Supplementary Table 3.** Summary of tumor incidence in MCM3<sup>+/-</sup> mice.



| Allele    | Primer name | Sequence (5'→3')           |
|-----------|-------------|----------------------------|
| Mcm3-Lox  | 1           | GTGTCTGAGGGCATCGTCTT       |
|           | 2           | CCTCACAAGCCCAATCCTAA       |
|           | 3           | GCAAGCTGACCCTGAAGTTC       |
| Mcm3-null | M           | TGCCTATGGCTCATCTGAAGAACTGC |
|           | 2           | CCTCACAAGCCCAATCCTAA       |
|           | 4           | TCTCCAGTGTTCTTGAGGC        |

**Supplementary Table 4.** Oligonucleotide primers used for mice genotyping.

| Gene  | Primer         | Sequence (5'→3')     |
|-------|----------------|----------------------|
| Mcm3  | <i>MCM3-Fw</i> | TTCCTCAGCTGTGTGGTCTG |
|       | <i>MCM3-Rv</i> | TCACCACCCTAGTGGCTTTC |
| Gapdh | GAPDH-Fw       | TGAAGCAGGCATCTGAGGG  |
|       | GAPDH-Rv       | CGAAGGTGGAAGAGTGGGAG |

**Supplementary Table 5.** Oligonucleotide primers used for qRT-PCR.

| Gene | Primer | Sequence (5'→3')          |
|------|--------|---------------------------|
| Mcm3 | Fw1    | ATTTCCGGAGCTGCGAC         |
|      | Fw3    | CCATCACCATCCAGGAGATG      |
|      | Fw4    | AAGCTGGTGCTATGGTCCTG      |
|      | Fw6    | CGTTTCCGGACTGTTTGGT       |
|      | Rv2    | CGATTCTTAAGTGATACTTGGTAGC |
|      | Rv3    | AGCAGAGGATTGCCTTCTTG      |
|      | Rv4    | GAACTACCCAATGGCAAAGC      |

**Supplementary Table 6.** Oligonucleotide primers for used for DNA sequencing.
